# Supplementary material
Source: PubMed Central journal article supplement (PMC4000104)
Supplement: EC.00243-13_zek999094249so1.pdf [file EC.00243-13_zek999094249so1.pdf]

Figure S1(a)

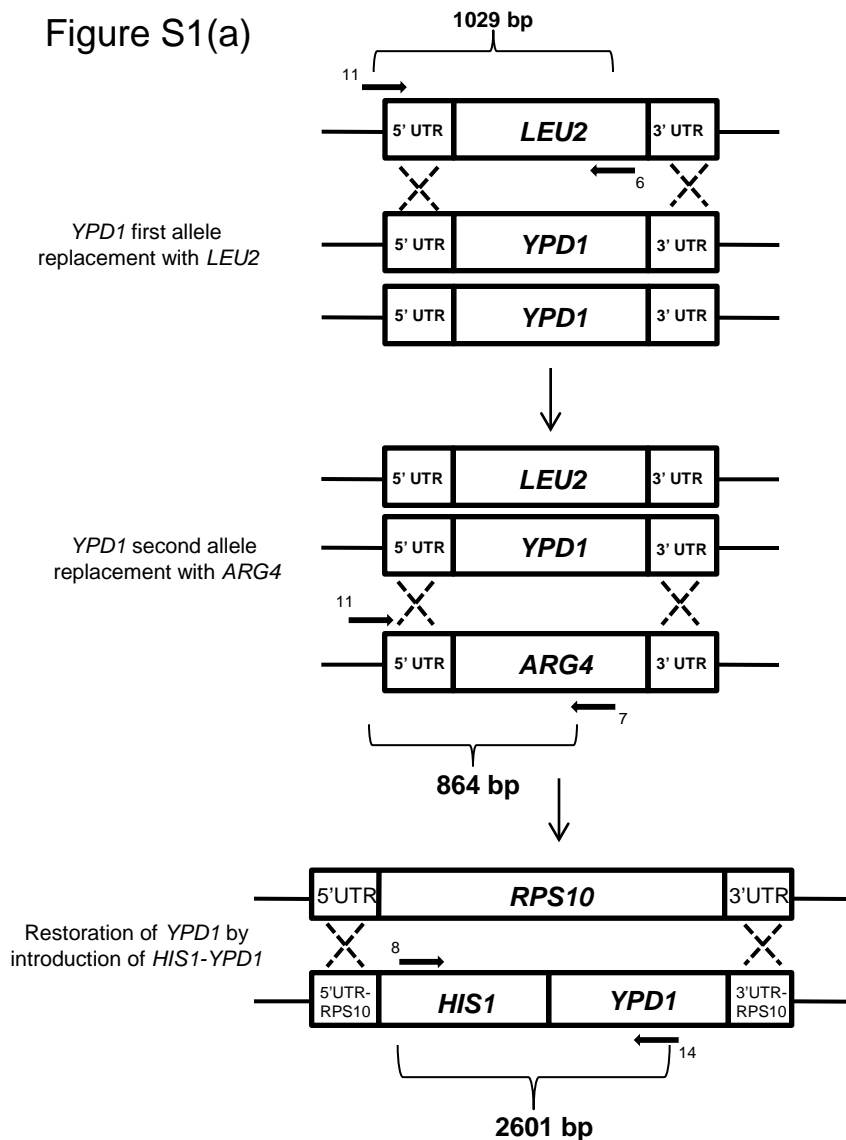

S1(b)

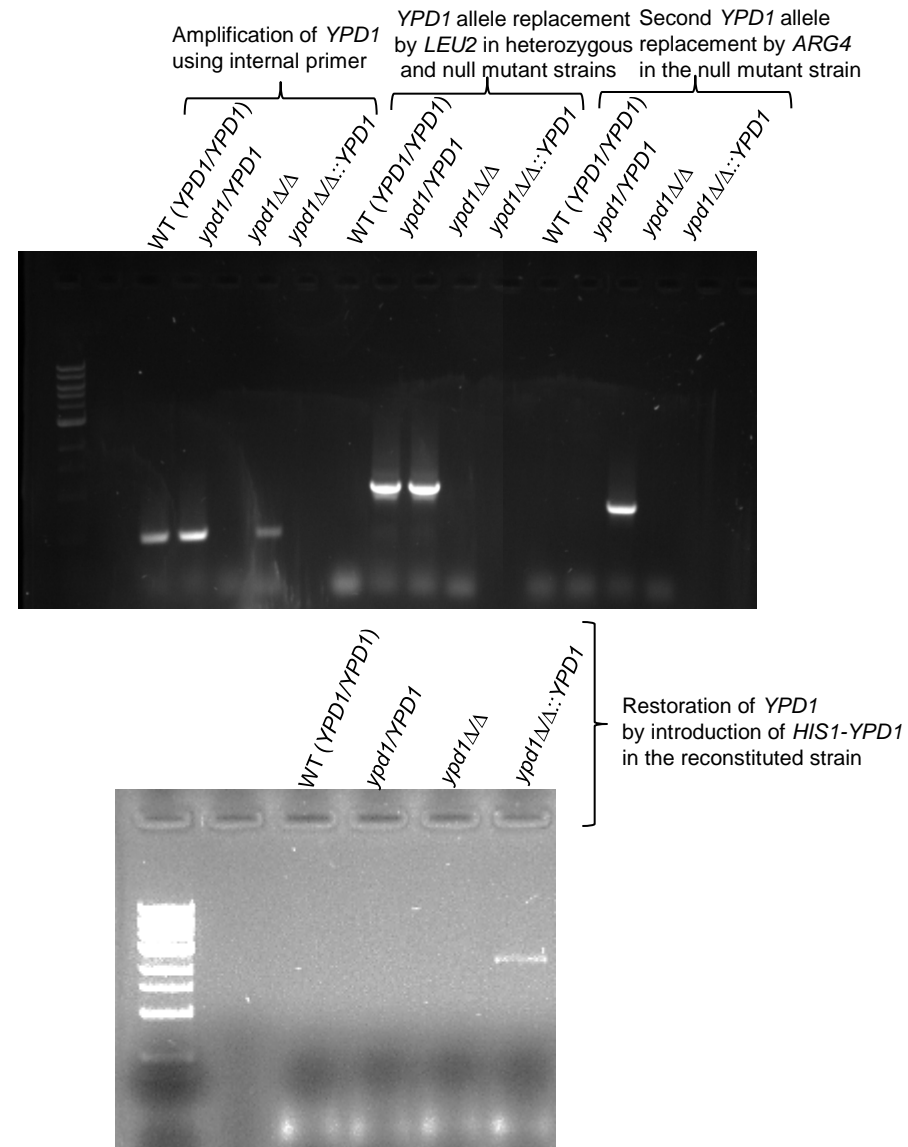

**Figure S1. Verification of the *ypd1Δ/Δ* mutant and reconstituted strains** (a) Schematic representation (size not to scale) of the construction of disruption cassettes to delete *YPD1* gene. (b) confirmation of *YPD1* deletion by PCR analysis. Lanes 1 to 4: (1) wild type SN425 (*YPD1/YPD1*), (2) heterozygous (*ypd1/YPD1*), (3) homozygous (*ypd1Δ/Δ*) and (4) reconstituted (*ypd1Δ/Δ::YPD1*) strains. Genomic DNA from these strains was used to confirm *YPD1* allele replacement and reconstitution. The PCR primer combinations are given on top of arrows and the expected band size is indicated by braces on top of each allele replacement schematic. The *ypd1Δ/Δ* was constructed by following the method of noble and Johnson (1). The *C. albicans* strains and plasmids used to disrupt *YPD1* are described in detail elsewhere (2-3).

## 1 **Construction of *YPD1* deletion mutant and reconstituted strains in *C. albicans***

### 2 **SN148 (Ura<sup>-</sup>) background**

3 To ascertain whether Ypd1-GFP fusion protein is functional we performed a  
4 complementation assay. To perform this assay we first needed to create a *ypd1* null  
5 mutant strain in *C. albicans* SN148 (Ura<sup>-</sup>) background. This was required because the  
6 Ypd1-GFP fusion plasmid contains *URA3* selection marker. The *ypd1Δ/Δ* strain  
7 described in the manuscript was created in SN152 (Ura<sup>+</sup>) background and could not be  
8 used for complementation because *URA3* selection was not available. The *YPD1* was  
9 disrupted in SN148 (Ura<sup>-</sup>) background by using the disruption cassettes (described in  
10 table S1) used to disrupt *YPD1* in SN152 (Ura<sup>+</sup>) background. A gene-reconstituted  
11 strain was created by PCR amplifying the full length *YPD1*-ORF including its promoter  
12 and subcloning it into Clp10 plasmid vector (4). This plasmid was linearized with *NcoI*  
13 and transformed in a previously generated *ypd1Δ/Δ* homozygous null mutant strain to  
14 re-integrate *YPD1*-ORF at the *RPS10* locus (ribosomal protein 10) in *C. albicans*  
15 genome. The heterozygous, null and gene-reconstituted strains created in SN148  
16 background were confirmed by PCR analysis (data not shown).

17 The pACT1-*YPD1*-GFP plasmid, described in the methods section, was used to  
18 transform into the *ypd1Δ/Δ* (Ura<sup>-</sup>) null mutant generated in the SN148 background. The  
19 recombinant plasmid containing *YPD1*-GFP fusion was linearized by using *StuI* prior to  
20 transformation into the *ypd1Δ/Δ* (Ura<sup>-</sup>) null mutant. Transformants were selected for  
21 uridine prototrophy. Transformants for correct integration of the *YPD1*-GFP construct at  
22 the *RPS10* locus were confirmed by PCR analysis (data not shown).

### 23 **Complementation assay**

24 The *C. albicans ypd1Δ/Δ* strain expressing Ypd1-GFP, the wild-type strain  
25 (*YPD1/YPD1*), the null mutant strain *ypd1Δ/Δ*, and the gene-reconstituted strain  
26 (*ypd1Δ/Δ::YPD1*) were incubated at 30°C for 48 h on YPD agar plates containing  
27 0.025% SDS. As described in the manuscript, the *ypd1Δ/Δ* strain was hypersensitive to  
28 SDS, while the sensitivity of the *ypd1Δ/Δ::YPD1-GFP* fusion strain to SDS was similar to  
29 that of the wild-type strain, suggesting that the GFP fusion protein restores the  
30 functional activity of Ypd1 after loss of the endogenous protein (see figure S2).  
31 Therefore, these data support the conclusion that the Ypd1-GFP fusion protein retains  
32 function in *C. albicans ypd1Δ/Δ* strain transformed with pACT1-*YPD1-GFP* and it  
33 complements the loss of Ypd1 (see figure S2).

34

Figure S2

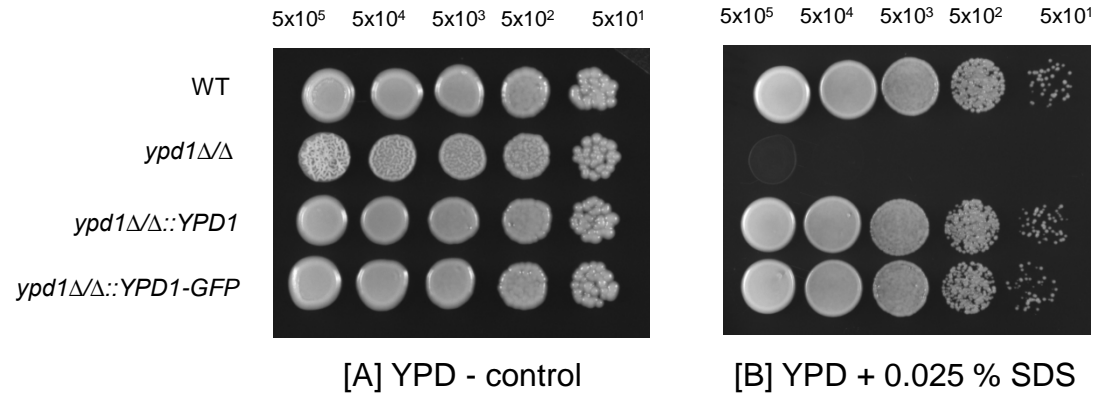

**Figure S2.** Growth of wild-type (WT) (*YPD1/YPD1*), *ypd1Δ/Δ*, *ypd1ΔΔ::YPD1* and *ypd1ΔΔ::YPD1-GFP* strains of *C. albicans* at 30°C for 48 h on YPD agar (control) (A) and YPD agar containing 0.025% SDS (B). Five-microliter cell dilutions ( $5 \times 10^5$  to  $5 \times 10^1$  cells) were spotted onto each plate.

## References

- 1. Noble SM, Johnson AD.** 2005. Strains and strategies for large-scale gene deletion studies of the diploid human fungal pathogen *Candida albicans*. *Eukaryot Cell*. **4**(2):298-309.
- 2. Noble SM, French S, Kohn LA, Chen V, Johnson AD.** 2010. Systematic screens of a *Candida albicans* homozygous deletion library decouple morphogenetic switching and pathogenicity. *Nat Genet*. **42**(7):590-8.
- 3. Desai C, Mavrianos J, Chauhan N.** 2011. *Candida albicans* SRR1, a putative two-component response regulator gene, is required for stress adaptation, morphogenesis, and virulence. *Eukaryot Cell* **10**:1370-1374.
- 4. Murad, A. M., P. R. Lee, I. D. Broadbent, C. J. Barelle, and A. J. Brown.** 2000. Clp10, an efficient and convenient integrating vector for *Candida albicans*. *Yeast* **16**:325-7.

Supplementary Table S1. List of plasmids used in the present study

| Plasmid        | Description /genotype                                                                                                                                                                                                                                                                                                  | Reference  |
|----------------|------------------------------------------------------------------------------------------------------------------------------------------------------------------------------------------------------------------------------------------------------------------------------------------------------------------------|------------|
| pSN40          | Cloning vector for construction of <i>C. albicans</i> gene deletion mutants; constructed by subcloning the <i>C. maltosa</i> <i>LEU2</i> ORF including promoter and terminator sequences into the pCR-Blunt II-TOPO vector (Invitrogen); <i>LEU2</i> , Kan <sup>r</sup> markers                                        | 24         |
| pSN69          | Cloning vector for construction of <i>C. albicans</i> gene deletion mutants; constructed by subcloning the <i>C. dubliniensis</i> <i>ARG4</i> ORF including promoter and terminator sequences into the pCR-Blunt II-TOPO vector (Invitrogen); <i>ARG4</i> , Kan <sup>r</sup> markers                                   | 24         |
| pSN75          | Cloning vector for reconstitution of <i>C. albicans</i> genes.                                                                                                                                                                                                                                                         | 25         |
| pNC-YPD1-5'UTR | Knock-out construct in which a 641bp SacI/Spel PCR fragment carrying 5'-UTR with the promoter region of <i>YPD1</i> and a 460bp NotI/ApaI PCR fragment carrying the 3' UTR region of <i>YPD1</i> gene were cloned flanking the <i>LEU2</i> marker into pSN40                                                           | This study |
| pNC-YPD1-3'UTR | Knock-out construct in which a 641bp KpnI/Spel PCR fragment carrying 5'-UTR with the promoter region of <i>YPD1</i> and a 460bp NotI/ApaI PCR fragment carrying the 3' UTR region of <i>YPD1</i> gene were cloned flanking the <i>ARG4</i> marker into pSN69                                                           | This study |
| pSN75-YPD1     | A strain reconstitution plasmid construct in which a 1425 bp XhoI fragment containing the complete 555 bp <i>YPD1</i> gene ORF along with promoter/terminator regions were cloned into pSN75 vector.                                                                                                                   | This study |
| pACT1-GFP      | pACT-GFP vector contains the codon-optimized yeast enhanced green fluorescent protein as reporter whose expression is driven by <i>CaACT1</i> promoter. pACT-GFP is based on parent plasmid Clp10 which provides homology for integration of target GFP-tagged genes at chromosomal RPS1 locus in <i>C. albicans</i> . | 27         |
| pACT1-YPD1-GFP | Reporter construct in which, 846 bp <i>YPD1</i> lacking a stop codon was amplified and cloned into HindIII site of pACT1-GFP. Resulting vector expresses a GFP-tagged Ypd1 protein.                                                                                                                                    | This study |

Supplementary Table S2. List of primers used in the present study.

| No. | Primer           | Sequence (5'-3')                           |
|-----|------------------|--------------------------------------------|
| 1   | YPD1-5'UTR-SacF  | ATGCGAGCTCACGTCATTGAGGTGGAGTGAGGTT         |
| 2   | YPD1-5'UTR-KpnF  | ATGCGGTACCACGTCATTGAGGTGGAGTGAGGTT         |
| 3   | YPD1-5'UTR-SpeR  | ATGCACTAGTGCCGTCTTGATTGGTTATCACTGC         |
| 4   | YPD1-3'UTR-NotF  | ATGCGCGGCCCGCATGGGTGTGCTTTGTTAGAGCAGC      |
| 5   | YPD1-3'UTR-ApaR  | ATGCGGGCCCTTCCCTGCATCTTCTTTTTACCGG         |
| 6   | LEU2 reverse     | CAATGCAATATCTTCAATGCCATT                   |
| 7   | ARG4 reverse     | TTTTACAAGTATGAAAGGAGGGGAAG                 |
| 8   | HIS1 forward     | AATGCTGCAGCTTATTGAGCGGTGCC                 |
| 9   | Recon-XhoI-F     | ATGCCTCGAGAACATATGCCTTGCTATTTTTTTAAATATATC |
| 10  | Recon-XhoI-R     | ATGCCTCGAGCTATTCGTAATATTCGTCCAATGCTCTTCT   |
| 11  | YPD1-Outside 5'F | GTAATTCCATTTATTATTTTGTTGGTCTCCCTC          |
| 12  | YPD1-Outside 3'R | CGAGAATTATGGTGCACCATTGCAAACATT             |
| 13  | YPD1-Internal-F  | TGTCGACTGGGCAGTGTTTAGTGA                   |
| 14  | YPD1-Internal-R  | TTGGTCGAATCCATCTCTCGCCTT                   |
| 15  | YPD-ACT-GFP-F    | AGTCAAGCTTATGTCAGAAGATAAATTACAAAAATTAC     |
| 16  | YPD-ACT-GFP-R    | AGTCAAGCTTTTCGTAATATTCGTCCAATG             |
